# Supplementary material for: PFOA and PFOS removal by ion exchange for water reuse and drinking applications: role of organic matter characteristics
Source: Royal Society of Chemistry journal article supplement (doi:10.1039/c9ew00409b), 2019-01-01
Supplement: c9ew00409b1.pdf [file c9ew00409b1.pdf]

# **PFOA and PFOS removal by ion exchange for water reuse and drinking applications: Role of organic matter characteristics**

Fuhar Dixit<sup>a</sup>, Benoit Barbeau<sup>b</sup>, Shadan Ghavam Mostafavi<sup>c</sup>, Madjid Mohseni<sup>a\*</sup>

<sup>a,c</sup> Department of Chemical and Biological Engineering, University of British Columbia, Vancouver, Canada

<sup>b</sup> Department of Civil, Geological and Mining Engineering, Polytechnique Montreal, Montreal, Quebec, Canada

8

## **Supplementary Information**

10

### **S.1 Trace Minerals for Synthetic Effluent**

Details on the addition of trace minerals for the preparation of synthetic effluents is presented below.

14

Table S.1 Details on trace minerals utilized for preparing the synthetic effluents

| Chemical                                                            | Stock Volume | Added mass (g) | Volume Added to 1 L final solution |
|---------------------------------------------------------------------|--------------|----------------|------------------------------------|
| Trace Minerals                                                      |              |                |                                    |
| FeSO <sub>4</sub> ·7H <sub>2</sub> O                                | 2L           | 6.06           | 2 mL                               |
| ZnSO <sub>4</sub> ·7H <sub>2</sub> O                                |              | 0.63           |                                    |
| CuSO <sub>4</sub> ·5H <sub>2</sub> O                                |              | 0.11           |                                    |
| CoCl <sub>2</sub> ·6H <sub>2</sub> O                                |              | 0.11           |                                    |
| H <sub>3</sub> BO <sub>3</sub>                                      |              | 0.10           |                                    |
| KI                                                                  |              | 0.10           |                                    |
| NiCl <sub>2</sub> ·6H <sub>2</sub> O                                |              | 0.04           |                                    |
| Al <sub>2</sub> (SO <sub>4</sub> ) <sub>3</sub> ·18H <sub>2</sub> O |              | 0.27           |                                    |
| MnCl <sub>4</sub> ·4H <sub>2</sub> O                                |              | 0.56           |                                    |
| Na <sub>2</sub> EDTA                                                |              | 13.73          |                                    |
| Na <sub>2</sub> EDTA                                                |              | 13.73          |                                    |

16

17

18

Table S.2. Details on other chemical species used for the preparation of synthetic effluents

| Chemical                                           | Stock Volume | Added mass (g) | Volume Added to 1 L<br>final solution |
|----------------------------------------------------|--------------|----------------|---------------------------------------|
| Phosphorous                                        |              |                |                                       |
| Na <sub>2</sub> HO <sub>4</sub> .7H <sub>2</sub> O | 2L           | 307.66         | 2 mL                                  |
| KH <sub>2</sub> PO <sub>4</sub>                    |              | 100.00         |                                       |
| Alkalinity                                         |              |                |                                       |
| NaHCO3                                             | 1.5 L        |                | 8 mL                                  |
| Ammonia                                            |              |                |                                       |
| NH4Cl                                              | 2L           |                | 2 mL                                  |

## 42 S.2 LCOCD data for natural waters

43 LCOCD was performed using HPLC (Perkin Elmer, Canada) with 900 Turbo Potable OC  
44 Analyzer (detection range: 0.2-10 mg C/L, GE Sievers, Canada) for analysis of the source water  
45 NOM using the previously described method <sup>1-3</sup>. Note, the LCOCD graphs for wastewaters were  
46 obtained using a Waters C-8 column while the LCOCD graphs for NOM isolates and surface  
47 waters were obtained on a Waters C-18 column resulting in different elution times for  
48 corresponding molecular weights.

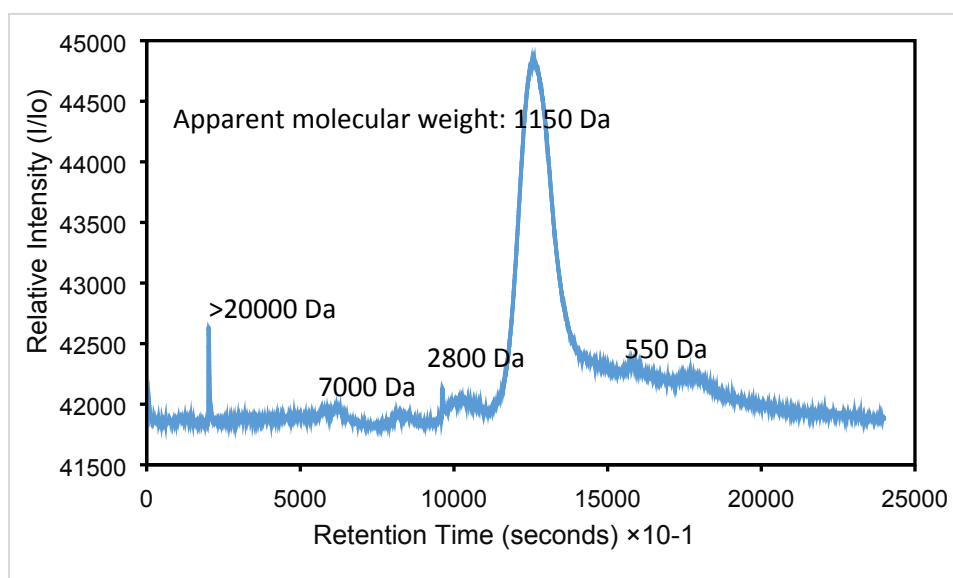

49

50 Figure S.1 LCOCD data for Vancouver Convention Centre Water before IX treatment.

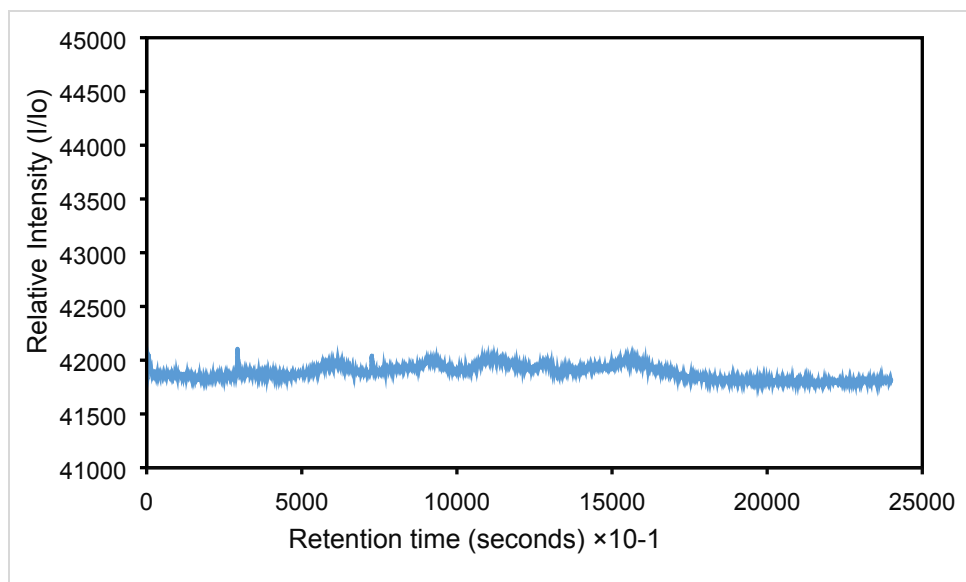

51

52 Figure S.2 LCOCD data for Vancouver Convention Centre Water after IX treatment (IX: 500  
53 mg/L, 24 hours).

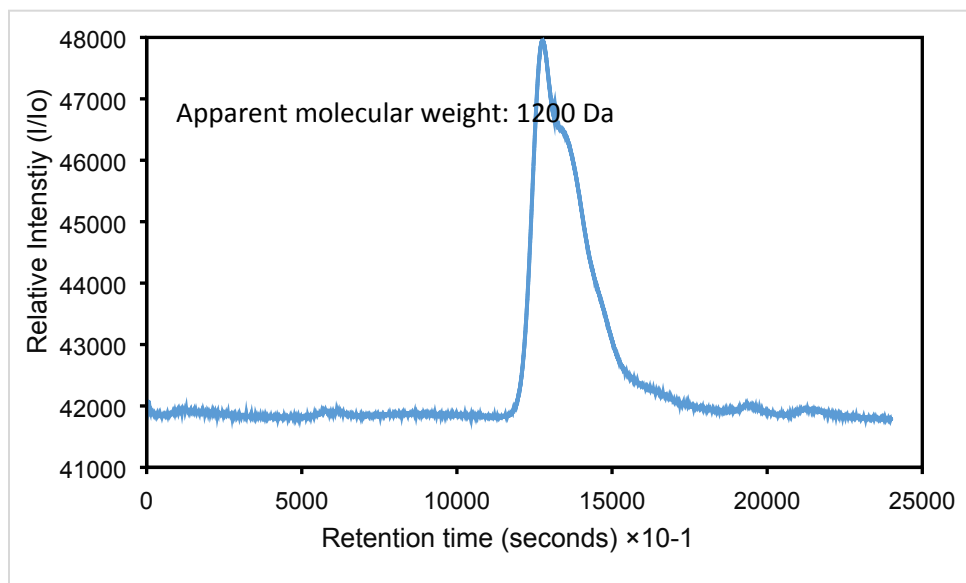

54

55 Figure S.3 LCOCD data for Synthetic effluent prepared at the UBC environmental laboratory  
56 before IX treatment.

57

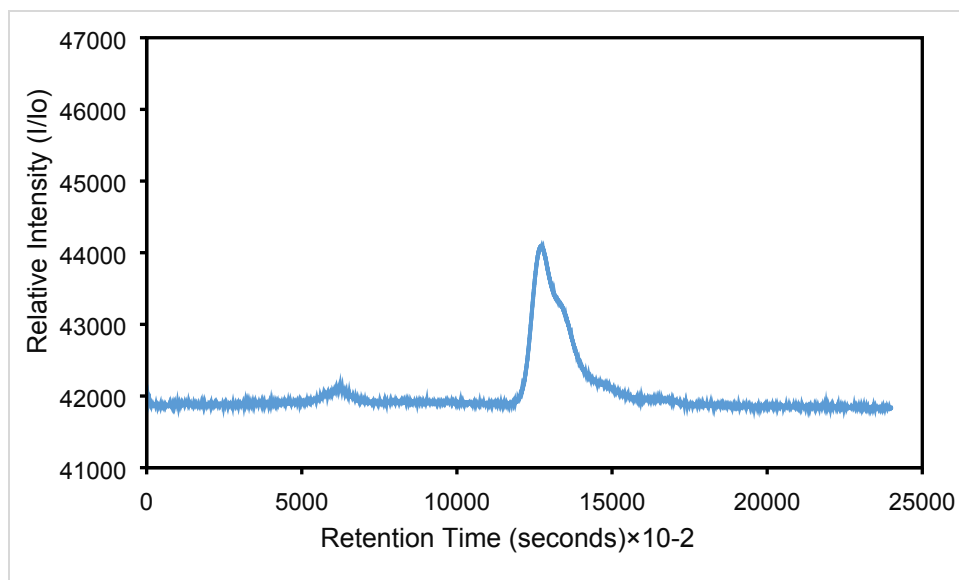

58

59 Figure S.4 LCOCD data for Synthetic effluent prepared at the UBC environmental laboratory  
60 after IX treatment (500 mg/L IX, 24 hours).

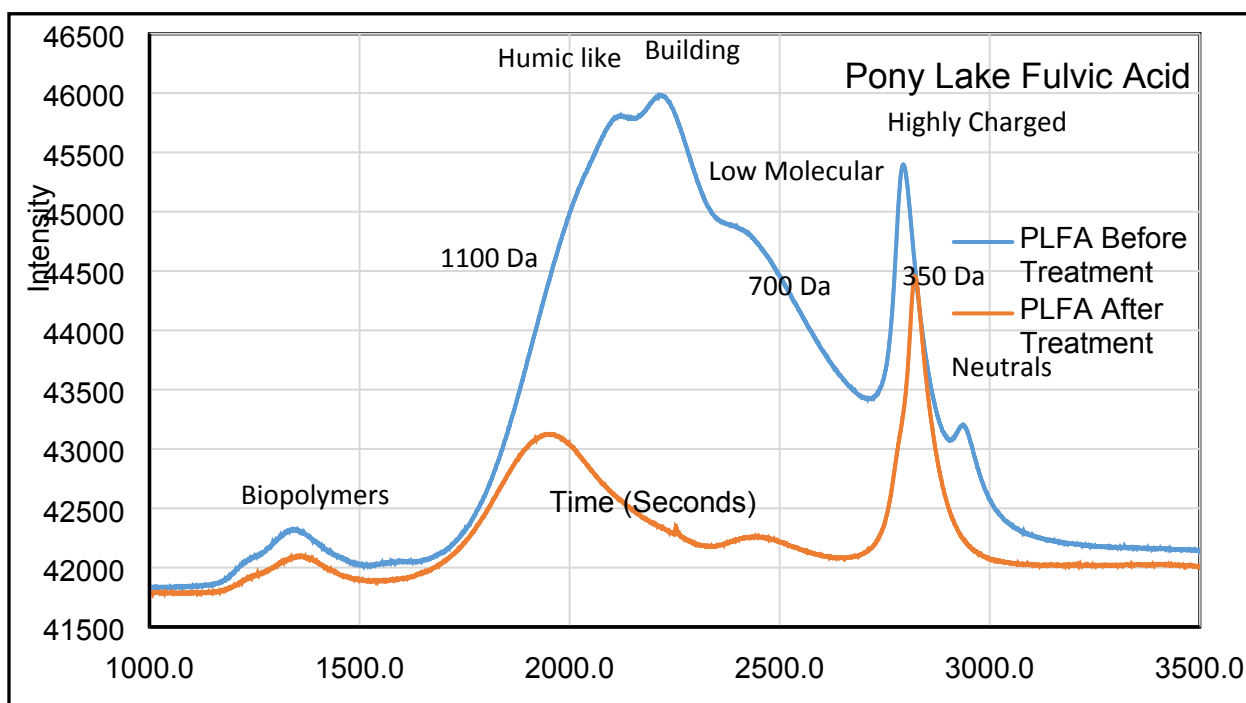

61

62 Figure S.5 LC-OCD graph for Pony Lake Fulvic Acid before and after IX treatment. (X axis  
63 represents elution time). IX dosage of 100 mg/L (or 0.45 mL/L).

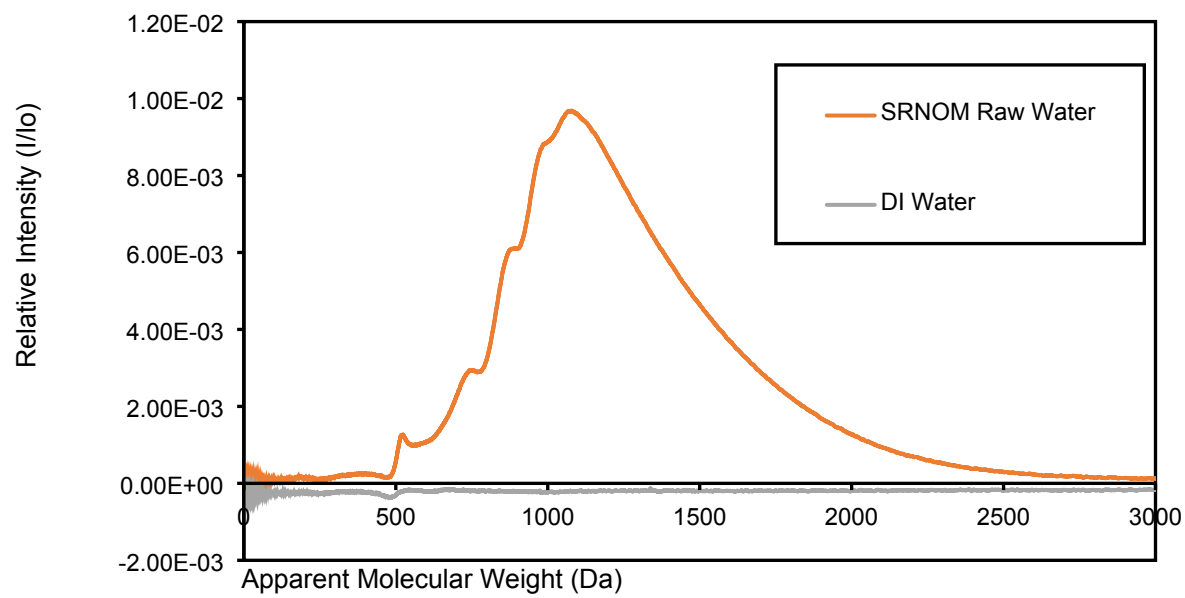

64

65 Figure S.6 LC-OCD graph for Suwannee River NOM plotted as a function of apparent molecular  
66 weight.

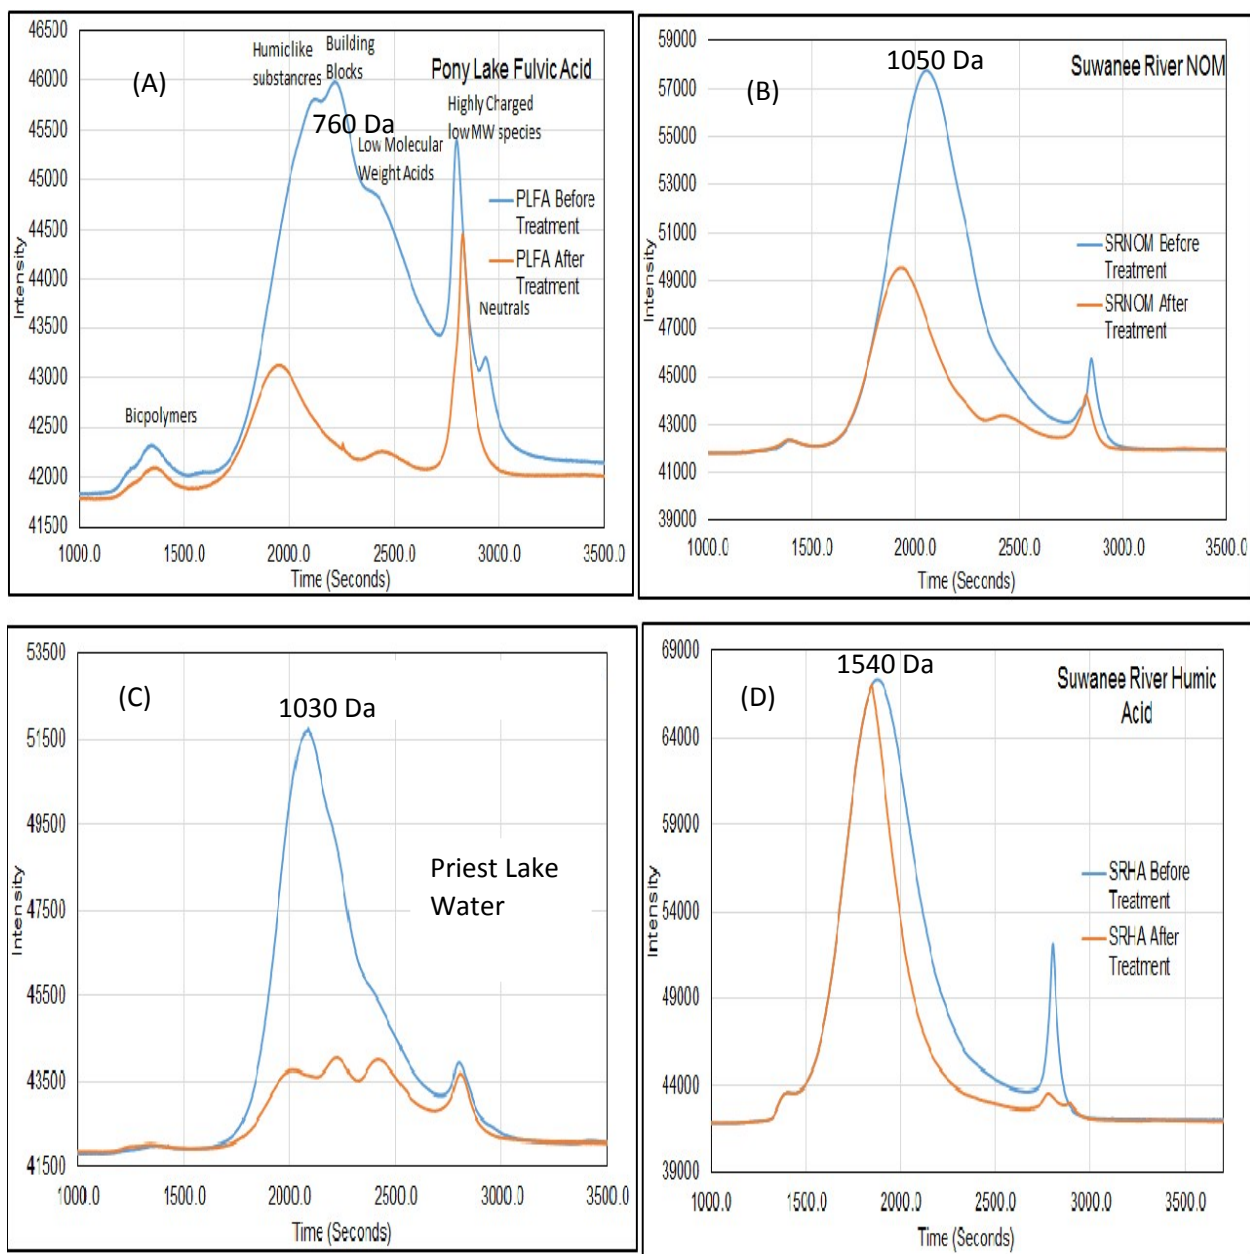

67

68 Figure S.7 Comparative LC-OCD graphs for (A) PLFA, (B) SRNOM, (C) Priest Lake (Natural  
69 Surface Water, Vancouver Island, BC, Canada), (D) SRHA.

70 \*Treated with IX dosage of 100 mg/L (or 0.45 mL/L)

71

72

### 73 S.3 Vancouver Convention Centre (VCC) Plant

74

75 The VCC treatment process comprises of a conventional activated sludge process followed by a  
76 treatment with membrane bioreactor. The plant treats grey and black water from the building.  
77 The treated water is used back in the washrooms for toilet flushing and rooftop irrigation during  
78 summer and warmer months.

79

80

### 81 S.4 Equivalent Background Concentration Model

82

83 The EBC parameters ( $K_{EBC}$ ,  $1/n_{EBC}$  and  $C_{oEBC}$ ) were determined according to the procedure  
84 described elsewhere<sup>2,4</sup>. The multicomponent interactions are predicted using the ideal adsorbed  
85 solution theory (IAST) which results in Eqs. 3.3 and 3.4, where  $K_{EBC}$  and  $1/n_{EBC}$  are the Freundlich  
86 single solute isotherm parameters for EBC and  $K_m$  and  $1/n_m$  are single solute isotherm parameters  
87 for the micropollutants. Measured concentrations were fitted to Eqs. 3.3 and 3.4 by using non-  
88 linear optimization schemes<sup>5,6</sup>.

$$89 \quad C_{me} = \frac{q_{me}}{q_{me} + q_{EBCe}} \left( \frac{n_m \times q_{me} + n_{EBC} \times q_{EBCe}}{n_m \times K_m} \right)^{\times n_m}$$

90 (3.3)

$$91 \quad C_{EBCe} = \frac{q_{EBCe}}{q_{me} + q_{EBCe}} \left( \frac{n_m \times q_{me} + n_{EBC} \times q_{EBCe}}{n_{EBC} \times K_{EBCe}} \right)^{\times n_{EBC}}$$

92 (3.4)

93 The obtained EBC concentrations of respective compounds  $C_{EBC}$  in  $\mu\text{eq/L}$ , are summarized in  
 94 Table 1.

95 The multicomponent interactions were further investigated as <sup>7</sup>:

$$(C_{i,0} - q_i C_{IX}) - \frac{q_i}{\sum_{j=1}^N q_j} \left( \frac{\sum_{j=1}^N n_j q_j}{n_i K_i} \right)^{n_i} = 0, \quad i = 1 \dots N$$

96 (3.5)

97 where subscript  $i$  represents the target component,  $N$  is the number of components (e.g., in a binary  
 98 system,  $N=2$ ,  $i = 1$  for MCLR, and  $i = 2$  for EBC),  $K_i$  and  $n_i$  represent the single-solute Freundlich  
 99 constants,  $C_{i,0}$  is the initial concentration of component  $i$  ( $\mu\text{eq/L}$ ),  $C_{IX}$  is the IX dosage (meq/L) and  
 100  $q_i$  is the solid phase concentration ( $\mu\text{mol/meq}$ ). The model predictions were made by performing  
 101 a non-linear optimization scheme as described elsewhere <sup>8</sup>.

102 The multicomponent interactions were further investigated as <sup>7,9</sup>:

$$(C_{i,0} - q_i C_{IX}) - \frac{q_i}{\sum_{j=1}^N q_j} \left( \frac{\sum_{j=1}^N n_j q_j}{n_i K_i} \right)^{n_i} = 0, \quad i = 1 \dots N$$

103 11

104 where subscript  $i$  represents the target component,  $N$  is the number of components (e.g., in a binary  
 105 system,  $N=2$ ,  $i = 1$  for GenX, and  $i = 2$  for EBC),  $K_i$  and  $n_i$  represent the single-solute Freundlich  
 106 constants,  $C_{i,0}$  is the initial concentration of component  $i$  ( $\mu\text{eq/L}$ ),  $C_{IX}$  is the IX dosage (meq/L) and  
 107  $q_i$  is the solid phase concentration ( $\mu\text{mol/meq}$ ).

108 For instance in a binary system, with say GenX in presence of Suwannee River NOM only, we get  
 109 the following

$$110 \quad C_{1,0} - q_1 C_{IX} - \frac{q_1}{q_1 + q_2} \left( \frac{n_1 q_1 + n_2 q_2}{n_1 K_1} \right)^{n_1} = 0,$$

111 12

$$112 \quad C_{2,0} - q_2 C_{IX} - \frac{q_2}{q_1 + q_2} \left( \frac{n_1 q_1 + n_2 q_2}{n_1 K_2} \right)^{n_2} = 0,$$

113 13

114 Where, subscript (i=1 or 2) represents GenX and the EBC,  $K_i$  and  $n_i$  represent the single-solute  
 115 Freundlich constants,  $C_{i,0}$  is the initial concentration of the component i ( $\mu\text{g/L}$ ),  $C_{IX}$  is the IX  
 116 dosage ( $\text{g/L}$ ) and  $q_i$  is the solid phase concentration ( $\mu\text{mol/L}$ ). As shown in equations 11 and 12,  
 117 besides the adsorption parameters for the target compound ( $C_{1,0}$ ,  $K_1$  and  $n_1$ ), three more EBC  
 118 parameters ( $C_{2,0}$ ,  $K_2$  and  $n_2$ ) are needed for the model prediction. These EBC parameters can be  
 119 acquired using a non-linear optimization algorithm that could simultaneously solve the IAST  
 120 equations as previously described<sup>8,10</sup>. In sum, it can be started with assumption of initial values  
 121 and assigning a small step change that can be added in recurring loops until the desired set of  
 122 values fit the model within a range of permissible error (predefined value of say 0.01% error).

123 To evaluate the difference between model predictions and experimental data Marquardt's percent  
 124 standard deviation (MPSD)<sup>11</sup> was used to predict the equilibrium adsorption data:

$$125 \quad \left( MPSD = 100 \sqrt{\frac{1}{m-p} \sum_{i=1}^p \left( \frac{q_{e\text{exp}} - q_{e\text{cal}}}{q_{e\text{exp}}} \right)^2} \right)$$

where  $m$  is the number of experimental measurements and  $p$  is the number of parameters in the competitive isotherm. A smaller MPSD value (generally  $<10$ ) corresponds to a better fit and lower error for the respective isotherm.

\*Note, do not get confused with the MPSD error which relates to the error of experimental data and model predictions with the error value (say the 0.01%) previously defined to obtain EBC values during non-linear programming. The error value (of say 0.01%) is utilized only to get the best possible values for the three EBC parameters that can fit the model with least error (here 0.01%). You may assign 0.001 % over 0.01% to get even better fits, it would just incur longer program runs to get the specified values.

## S.5 Resin micro porosity data

Table S.3. Resin porosimetry results for IX resin (Purolite A860) and dimensions of SRFA and PFOA <sup>2</sup>

| Pore Size                   | Cumulative Pore Area<br>(m <sup>2</sup> /g) × 10 <sup>-3</sup> | Pore Volume<br>(mL/g) × 10 <sup>-2</sup> | Pore Area (%) | Pore Volume (%) |
|-----------------------------|----------------------------------------------------------------|------------------------------------------|---------------|-----------------|
| Macropores (>50 nm)         | 1.0                                                            | 3.1                                      | < 0.1         | 18              |
| Mesopores (2-50 nm)         | 5.3                                                            | 4.3                                      | 25.3          | 26              |
| Micropores (<2nm)           | 15.6                                                           | 9.0                                      | 74.6          | 56              |
| Dimensions of MCLR and SRFA |                                                                |                                          |               |                 |
| Molecule                    | Size Range (nm)                                                |                                          | Median (nm)   |                 |
| SRFA <sup>12</sup>          | 0.8-5                                                          |                                          | 2 nm          |                 |

143

## 144 S.6 Inorganic Ion Removal

145 Table S.4. Initial and final concentrations of inorganic ions from VCC water before and after IX  
146 treatment.

| Inorganic ion                           | Nitrate    | Sulphate   | Phosphate  |
|-----------------------------------------|------------|------------|------------|
| Initial Concentration (mg/L)            | 26.1 ± 0.2 | 32.3 ± 0.5 | 10.4 ± 0.3 |
| Concentration after IX treatment (mg/L) | 7.2 ± 0.5  | 2.6 ± 0.6  | 1.8 ± 0.2  |
| Percentage Removal (%)                  | 72 ± 2     | 92 ± 2     | 84 ± 2     |

147

148

149

## 150 S.7 Estimation of diffusion coefficients and Biot number

151 The analytical solution for intraparticle diffusion model (IDM) for single sized resin beads in a  
152 completely stirred tank reactor are described by the following equations:

$$153 \quad U_t = \frac{C_o - C_t}{C_o - C_e} = \frac{q_t}{q_e} = 1 - \sum_{n=1}^{\infty} \omega \frac{6(\omega + 1)}{9 + 9\omega + \beta_n^2 \omega^2} \times \exp\left(-\frac{D_{a,1} \beta_n^2 t}{R_p^2}\right)$$

$$154 \quad 1$$

155  $\omega$  is calculated from:

$$156 \quad \frac{q_e}{VC_o} = \frac{1}{1 + \omega}$$

2

157  $\beta_n$  are non – zero roots of the equation:

$$\tan \beta_n = \frac{3\beta_n}{1 + \omega\beta_n^2}$$

3

159

160 Where  $U(t)$ , is the fractional attainment of equilibrium and  $C_o$ ,  $C_t$  and  $C_e$  are concentrations of  
 161 solute (mg/L) at time  $t=0$ , at time  $t$ , and at equilibrium, respectively.  $R_p$  is the radius of the resin  
 162 (assumed spherical, 0.375 cm) and  $D_{a,l}$  is the apparent diffusivity ( $\text{cm}^2/\text{s}$ ).

163 As opposed to intraparticle diffusion, the following equation represents the changes in the MCLR  
 164 concentration for the case of film diffusion controlled removal:

$$U(t) = 1 - \exp\left(-\frac{3 \cdot D_f \cdot (V' C' + V C_o)}{R_p \cdot \delta \cdot C' V}\right)$$

4

167 Where  $C'$  is the resin exchange capacity (meq/L),  $\delta$  is the film thickness ( $10^{-3} \text{ cm}$ ),  $C_o$  is the  
 168 initial solute concentration (meq/L),  $V$  is the solution volume (L),  $V'$  is the resin volume (L),  $D_f$  is  
 169 the film diffusion coefficient ( $\text{cm}^2/\text{s}$ ).

170 For both IPD and film diffusion models,  $D_f$  or  $D_{a,l}$  are assumed to be constant and are estimated  
 171 based on nonlinear optimization schemes.

172 The curve fitted for  $D_f$  agreed well with the experimental data ( $0.95 < R^2 < 0.98$ ), while the quality  
 173 of fit for the pore diffusion model ( $0.96 < R^2 < 0.99$ ), was well fitted under the dilute condition  
 174 assumption, as described elsewhere<sup>13</sup>.

175 The rate-controlling step was further investigated using the dimensionless Biot number (Bi) which  
 176 is the ratio of internal mass transfer (i.e., pore diffusion) to external mass transfer (i.e. film  
 177 diffusion) resistances <sup>14</sup>

$$178 \quad Bi = \frac{k_f \cdot R_p}{D_{pe}} \quad 5$$

179 where  $k_f$  (cm/s) is the external mass transfer coefficient ( $k_f = D_f/\delta$ ) and  $D_f$  (cm<sup>2</sup>/s), is the film  
 180 diffusion coefficient and  $D_{pe}$  (cm<sup>2</sup>/s) is the effective pore diffusion coefficient ( $\delta$  is film thickness  
 181  $\approx 10^{-3}$  cm according to <sup>15</sup>. The  $Bi \ll 1$  indicates film diffusion as the rate-limiting step where  $Bi$   
 182  $\gg 1$  shows pore diffusion to be the rate limiting step.

183

184  $D_a$  accounts for free liquid diffusion ( $D_l$ ) and sorption to resins resistances, and tortuous  
 185 diffusion pathway through inside the resins and is correlated to effective pore diffusivity ( $D_{p,e}$ ) as  
 186 follows (Weber Jr and DiGiano, 1996):

187

$$188 \quad D_a = \frac{D_l \cdot \varepsilon / \tau}{[(1 - \varepsilon) \rho_s K_D + \varepsilon]} = \frac{D_{pe} \cdot \varepsilon}{[(1 - \varepsilon) \rho_s K_D + \varepsilon]} \quad 6$$

189

190 Where  $K_D$  is the linear equilibrium partition coefficient,  $\varepsilon$  is the resin porosity  $\sim 0.46$  <sup>13</sup>,  $\tau$  is the  
 191 tortuosity of the resin and is estimated to be  $\sim 3$  <sup>13,16,17</sup>.  $\rho_s$  is solid phase density of 1.08 g/cm<sup>3</sup>  
 192 (manufacturer), and  $D_{p,e}$  is effective pore diffusion coefficient (cm<sup>2</sup>/s).

193  $\varepsilon/\tau$  accounts for reduction in  $D_l$  because of the tortuosity of the diffusion path and the term  $[(1-\varepsilon)$   
194  $\rho_s K_D + \varepsilon]$  is referred to as retardation factor, by which the liquid diffusivity is reduced due to  
195 local microscale partitioning. Assuming a linear distribution of toxin between the solid and liquid  
196 phases was plausible because of the low concentrations of the solute (i.e.,  $\sim 1$ -100  $\mu\text{g MCLR/L}$ ).  
197 The  $R^2$  values obtained for the linear correlation were between 0.92-0.98<sup>2,13</sup>.

198

199

## 200 **References**

- 201 (1) Huber, S. A.; Balz, A.; Abert, M.; Pronk, W. Characterisation of Aquatic Humic and Non-  
202 Humic Matter with Size-Exclusion Chromatography – Organic Carbon Detection –  
203 Organic Nitrogen Detection (LC-OCD-OND). *Water Res.* **2011**, *45* (2), 879–885.
- 204 (2) Dixit, F.; Barbeau, B.; Mohseni, M. Characteristics of Competitive Uptake between  
205 Microcystin-LR and Natural Organic Matter (NOM) Fractions Using Strongly Basic  
206 Anion Exchange Resins. *Water Res.* **2018**, *139*, 74–82.
- 207 (3) Winter, J.; Wray, H. E.; Schulz, M.; Vortisch, R.; Barbeau, B.; Bérubé, P. R. The Impact  
208 of Loading Approach and Biological Activity on NOM Removal by Ion Exchange Resins.  
209 *Water Res.* **2018**, *134*, 301–310.
- 210 (4) Newcombe, G.; Morrison, J.; Hepplewhite, C. Simultaneous Adsorption of MIB and  
211 NOM onto Activated Carbon. I. Characterisation of the System and NOM Adsorption.  
212 *Carbon N. Y.* **2002**, *40* (12), 2135–2146.
- 213 (5) Ebie, K.; Li, F.; Azuma, Y.; Yuasa, A.; Hagishita, T. Pore Distribution Effect of Activated  
214 Carbon in Adsorbing Organic Micropollutants from Natural Water. *Water Res.* **2001**, *35*

- 215 (1), 167–179.
- 216 (6) Matsui, Y.; Yoshida, T.; Nakao, S.; Knappe, D. R. U.; Matsushita, T. Characteristics of  
217 Competitive Adsorption between 2-Methylisoborneol and Natural Organic Matter on  
218 Superfine and Conventionally Sized Powdered Activated Carbons. *Water Res.* **2012**, *46*  
219 (15), 4741–4749.
- 220 (7) Bunmahotama, W.; Hung, W. N.; Lin, T. F. Prediction of the Adsorption Capacities for  
221 Four Typical Organic Pollutants on Activated Carbons in Natural Waters. *Water Res.*  
222 **2017**, *111*, 28–40.
- 223 (8) Crittenden, J. C.; Sanongraj, S.; Bulloch, J. L.; Hand, D. W.; Rogers, T. N.; Speth, T. F.;  
224 Ulmer, M. Correlation of Aqueous-Phase Adsorption Isotherms. *Environ. Sci. Technol.*  
225 **1999**, *33* (17), 2926–2933.
- 226 (9) Dixit, F.; Barbeau, B.; Mohseni, M. Microcystin-LR Removal by Ion Exchange:  
227 Investigating Multicomponent Interactions in Natural Waters. *Environ. Pollut.* **2019**, *253*,  
228 790–799.
- 229 (10) Najm, I. N.; Snoeyink, V. L.; Richard, Y. Effect of Initial Concentration of a SOC in  
230 Natural Water on Its Adsorption by Activated Carbon. *J. Am. Water Works Assoc.* **1991**,  
231 *83* (8), 57–63.
- 232 (11) Kumar, K. V.; Porkodi, K.; Rocha, F. Comparison of Various Error Functions in  
233 Predicting the Optimum Isotherm by Linear and Non-Linear Regression Analysis for the  
234 Sorption of Basic Red 9 by Activated Carbon. *J. Hazard. Mater.* **2008**, *150* (1), 158–165.
- 235 (12) Wells, M. Conductivity-Dependent Flow Field-Flow Fractionation of Fulvic and Humic

- 236 Acid Aggregates. *Chromatography* **2015**, 2 (3), 580–593.
- 237 (13) Bazri, M. M.; Mohseni, M. Impact of Natural Organic Matter Properties on the Kinetics of  
238 Suspended Ion Exchange Process. *Water Res.* **2016**, 91, 147–155.
- 239 (14) Ko, D. C. K.; Porter, J. F.; McKay, G. Film-Pore Diffusion Model for the Fixed-Bed  
240 Sorption of Copper and Cadmium Ions onto Bone Char. *Water Res.* **2001**, 35 (16), 3876–  
241 3886.
- 242 (15) Helfferich, F. Ion-Exchange Kinetics. V. Ion Exchange Accompanied by Reactions. *J.*  
243 *Phys. Chem.* **1965**, 69 (4), 1178–1187.
- 244 (16) Li, P.; Sengupta, A. K. Intraparticle Diffusion during Selective Ion Exchange with a  
245 Macroporous Exchanger. *React. Funct. Polym.* **2000**, 44, 273–287.
- 246 (17) Li, P.; SenGupta, A. K. Intraparticle Diffusion during Selective Sorption of Trace  
247 Contaminants: The Effect of Gel versus Macroporous Morphology. *Environ. Sci. Technol.*  
248 **2000**, 34 (24), 5193–5200.
- 249
- 250
